# Supplementary material for: Deoxygenation of the Gulf of Mexico thermocline linked to a decrease in the detachment frequency of Loop Current Eddies
Source: Copernicus journal article supplement (doi:10.5194/egusphere-2023-751), 2023-04-25
Supplement: Supplementary file [file egusphere-2023-751-AC3-supplement.pdf]

Annex of new figures and tables proposed to correct the manuscript.

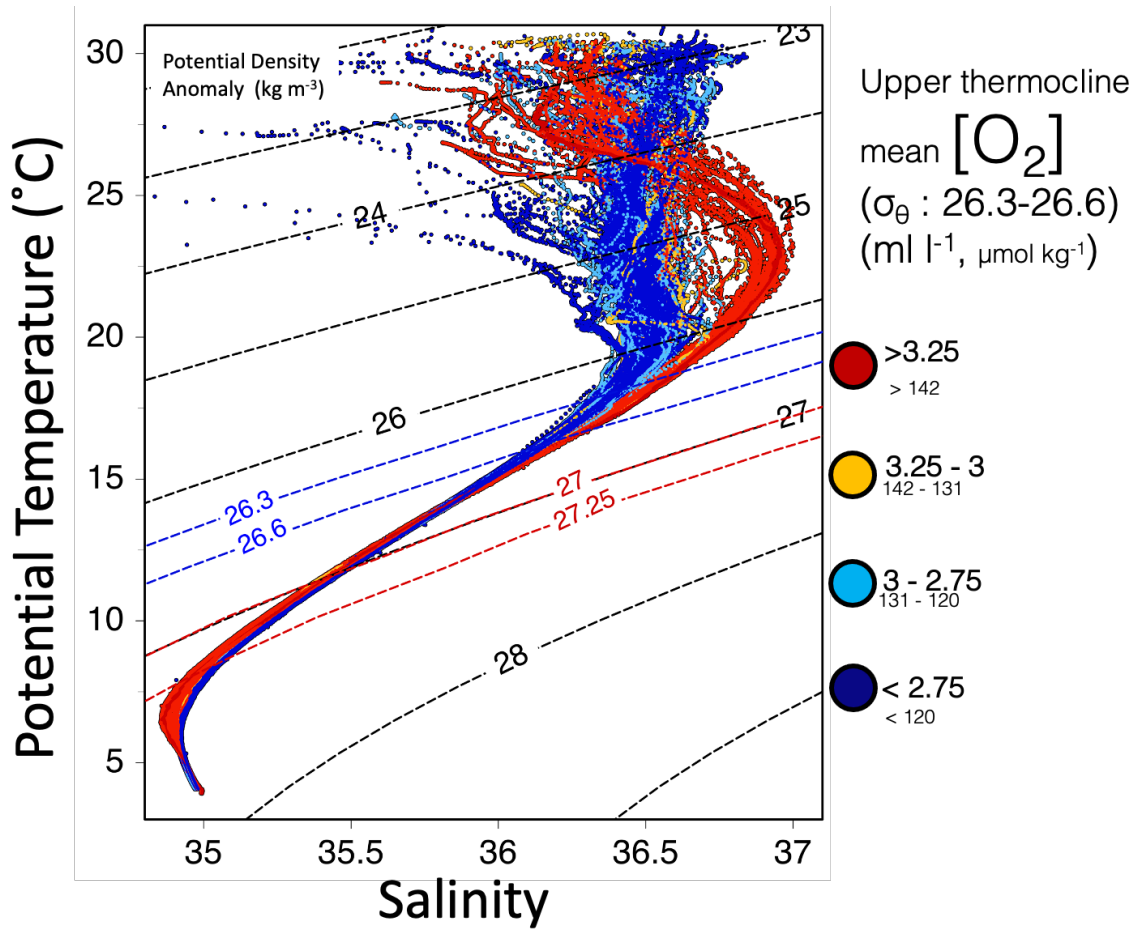

Figure 7. T-S diagram of all XIXIMI stations, color coded according to the upper thermocline oxygen range.

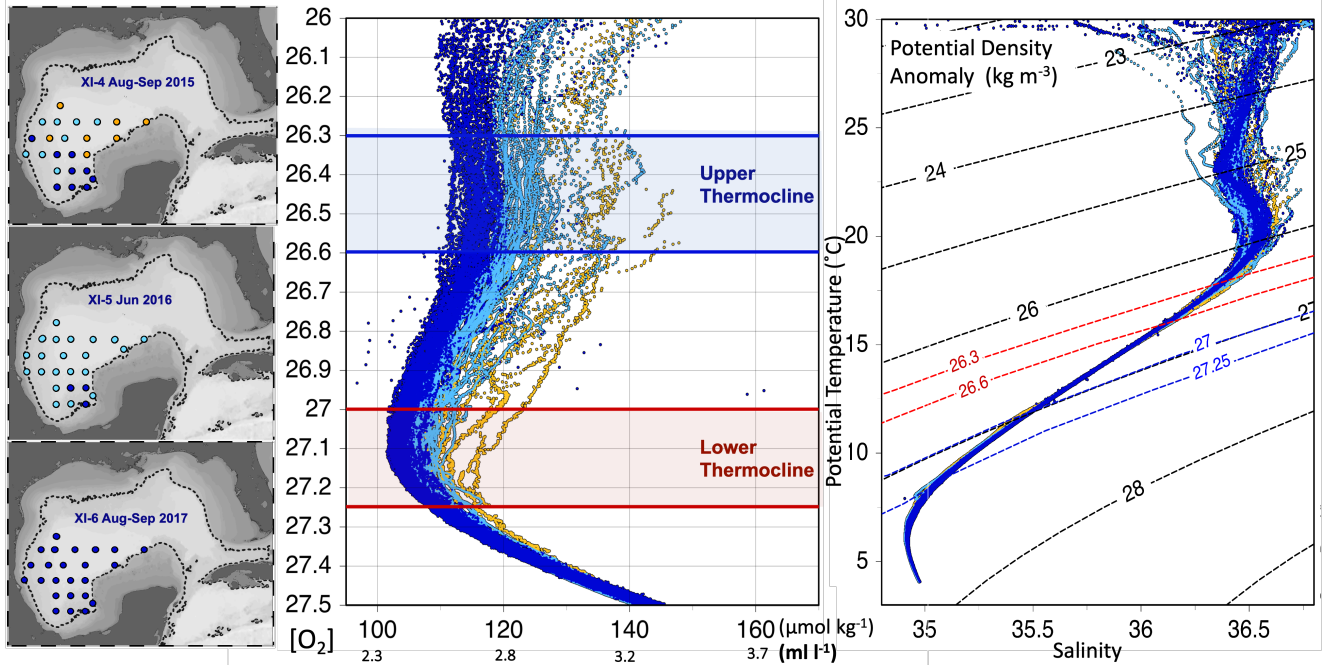

Figure 8. Maps of 24 stations from cruises XIXMI 4, 5 and 6 in the same coordinates. Density profile of oxygen from 24 stations from cruises XIXMI 4, 5 and 6. T-S diagram of 24 stations from cruises XIXMI 4, 5 and 6 in the same coordinates.

Table 5

Mean oxygen, salinity and temperature in the upper and lower main thermocline of the Gulf of Mexico (data from 24 stations located in the same coordinates for each cruise)

| Cruise                      | Mean [O <sub>2</sub> ] (ml l <sup>-1</sup> ,<br>μmol kg <sup>-1</sup> ) |                             | Mean Salinity                |                             | Mean Temperature (°C)        |                             |
|-----------------------------|-------------------------------------------------------------------------|-----------------------------|------------------------------|-----------------------------|------------------------------|-----------------------------|
|                             | $\sigma_\theta$ (kg m <sup>-3</sup> )<br>26.3-26.6                      | $\sigma_\theta$<br>27-27.25 | $\sigma_\theta$<br>26.3-26.6 | $\sigma_\theta$<br>27-27.25 | $\sigma_\theta$<br>26.3-26.6 | $\sigma_\theta$<br>27-27.25 |
| XIXIMI-4<br>Aug-Sep<br>2015 | 2.87 ±<br>0.19<br>125 ± 8.6                                             | 2.8 ± 0.08<br>107.8 ± 3.4   | 36.29 ±<br>0.88              | 35.26 ±<br>0.14             | 17.18 ± 0.62                 | 9.9 ± 0.9                   |
| XIXIMI-5<br>Jun<br>2016     | 2.84 ±<br>0.06<br>123.5 ± 2.7                                           | 2.8 ± 0.05<br>107.9 ± 2.3   | 36.29 ±<br>0.82              | 35.24 ±<br>0.13             | 17.18 ± 0.61                 | 9.84 ±<br>0.99              |
| XIXIMI-6<br>Aug-Sep<br>2017 | 2.67 ±<br>0.05<br>115.6 ± 2.2                                           | 2.8 ± 0.05<br>105.1 ± 2.1   | 36.27 ±<br>0.85              | 35.16 ±<br>0.13             | 17.04 ± 0.63                 | 9.76 ± 0.98                 |

A constant oxygen change rate without LCE detachment was assumed as the oxygen difference measured between cruises XIXIMI-5 to 6.

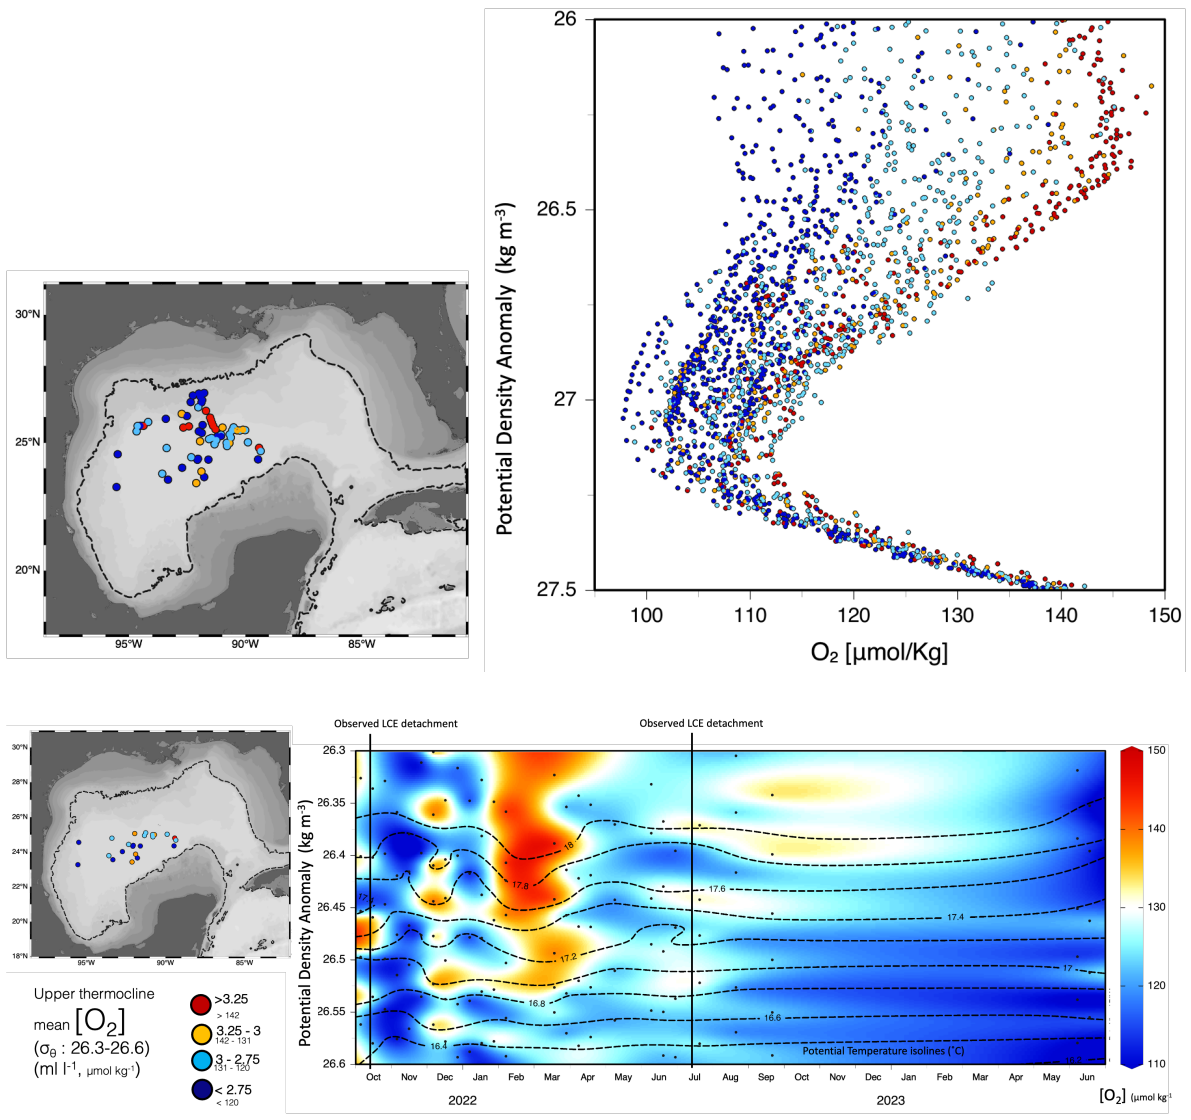

Figure 9 . Data from BioARGO Buoy 4903622 from October 2021 to June 2023. Temporal variability of BioARGO buoy 4903622 for stations at and south of 25°N, map of stations color coded according to the upper thermocline oxygen range

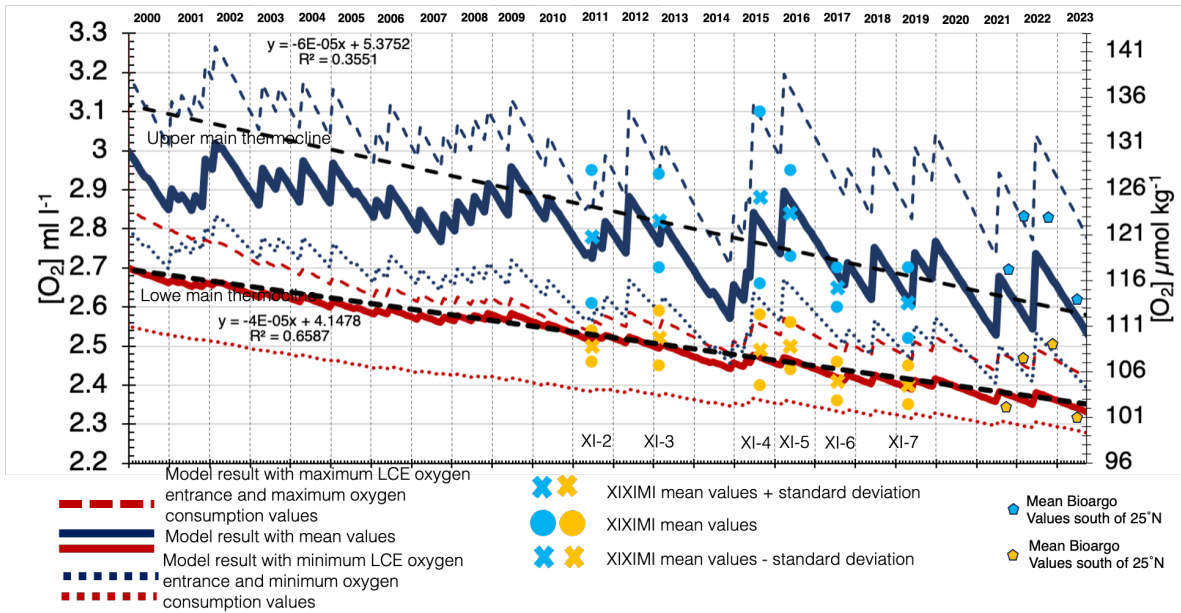

Figure 6 remade. Oxygen variability estimated from box model for the upper (blue) and lower (red) thermocline from 2000 to 2023, with data from XIXIMI cruises and BioARGO buoy 4903622.
